# Supplementary material for: Acoustofluidic rotational tweezing enables high-speed contactless morphological phenotyping of zebrafish larvae
Source: PubMed Central journal article supplement (PMC7892888; doi:10.1038/s41467-021-21373-3), 2021-02-18
Supplement: 41467_2021_21373_MOESM2_ESM.pdf [file 41467_2021_21373_MOESM2_ESM.pdf]

**Title: Supplementary Video 1.**

**Description:** Acoustofluidic rotational manipulation and imaging of a 5 dpf zebrafish.

**Title: Supplementary Video 2.**

**Description:** The rotation speed of a 5 dpf zebrafish under 5 different input voltages.

**Title: Supplementary Video 3.**

**Description:** The microscopic images and 3D reconstruction model projections of a *Tg(fabp10:DsRed; els3l: GFP)<sup>gz12</sup>* 5 dpf zebrafish larva over one rotation cycle, including images of merged fields and exploded fields (bright field, DsRed, GFP).

**Title: Supplementary Video 4.**

**Description:** Acoustofluidic rotational manipulation and imaging of three typical acute ethanol (EtOH) exposed zebrafish with morphological deformation.

**Title: Supplementary Video 5.**

**Description:** Continuous imaging of acute ethanol (EtOH) exposed zebrafish liver.

**Title: Supplementary Video 6.**

**Description:** Projections of zebrafish liver models in **Fig. 6c** from multiple angles.

**Title: Supplementary Video 7.**

**Description:** Rotational motion of a zebrafish yolk within an intact chorion (0 dpf, prior to tail extension).
